# Supplementary material for: Assessing the feasibility and acceptability of a pilot peer led intervention to reduce stigma and improve ART adherence among young men having sex with men and transgender women living with HIV in low resource settings in Southern Africa
Source: Research Square preprint supplement (doi:10.21203/rs.3.rs-8826781/v1), 2026-02-18
Supplement: Supplementary file 1 [file 68eb19247d8e607eb2202cb0.docx]

**Assessing the feasibility and** **acceptability of a pilot peer led intervention to reduce stigma and improve ART adherence among young men having sex with men and transgender women living with HIV in low resource settings in Southern Africa**

**Pilot Intervention Manual**

**Table of Contents**

[1. Introduction 1](#_Toc220222789)

[2. Purpose of the Manual 1](#_Toc220222790)

[3. Key Terms and Techniques 2](#_Toc220222791)

[4. Overview of the Intervention 3](#_Toc220222792)

[5. Intervention Participants and Peer Facilitators 6](#_Toc220222793)

[5.1. Intervention Participants 6](#_Toc220222794)

[5.2. Participant Engagement 6](#_Toc220222795)

[5.3. Intervention Locations 6](#_Toc220222796)

[5.4. Intervention Facilitators 7](#_Toc220222797)

[5.5. Support for Intervention Facilitators 7](#_Toc220222798)

[5.6. Getting Ready for the Launch 8](#_Toc220222799)

[6. Session 1: Starting the Journey 9](#_Toc220222800)

[7. Session 2: HIV and Me--HIV and ART from A to Z 11](#_Toc220222801)

[8. Session 3: Managing Disclosure and Adherence Skills 13](#_Toc220222802)

[9. Session 4: Mental health, coping and resilience 15](#_Toc220222803)

[10. Session 5 16](#_Toc220222804)

[11. Session 6 16](#_Toc220222805)

[12. Session 7 17](#_Toc220222806)

[13. Session 8 18](#_Toc220222807)

[14.1. Research Measures 19](#_Toc220222808)

[14.2. Risks and Risk Mitigation 20](#_Toc220222809)

[References 21](#_Toc220222810)

# Introduction

Across the southern African region, individuals from key populations (KPs), particularly young men who have sex with men (MSM) and transgender women, have become priorities for HIV programming, including those already living with HIV. These efforts unfold in a context where the risks of stigma, discrimination and violence remain acute, based on sexual orientation, gender identity and health status, and where little is known about the influence of these stigmas on uptake and retention on anti-retroviral treatment (ART) and other health outcomes. Starting in 2021, a multi-county, applied research project has been exploring the influence of intersectional stigma on young (18-24 years) HIV-positive MSM and transgender women on their uptake and retention on ART. To date, the research has examined the extent to which intersectional experiences of stigma and discrimination, based on sexual orientation or gender identify and HIV-status, may interfere with ART-related commitments and behaviours. The ongoing project is designed around four main objectives: (1) exploratory research examining experiences of intersectional stigma ; (2) development of a conceptual model or theory of change; (3) design of an intervention based on the conceptual model in order to mitigate stigma effects and improve ART uptake and adherence; and (4) documentation of project results in the form of guidelines for improved intervention design and quality of care across the SADC region. This manual is linked to objective (3), the piloting of a short, theory-driven, manualised intervention to mitigate the negative influence of intersectional stigma and to improve commitment to ART adherence and other health-affirming beliefs and practices.

# Purpose of the Manual

The purpose of the manual is to guide the implementation of an eight-week pilot intervention in three countries, Malawi, Zambia and Zimbabwe. Fidelity is an important goal of creating the manual to ensure that, in each setting where the intervention is piloted, there is a consistent approach to implementation and that the results are valid and comparable across the three settings. The manual is meant to guide peer facilitators on how to deliver the intervention; researchers and research assistants on how to collect data on the effects of the intervention; and host organisations and others on how to support effective implementation of the pilot and to quality assure the results.

# Key Terms and Techniques

The design of the intervention includes several group-focussed techniques to encourage self-reflection, discovery and disclosure, learning and development. Below is a list of the key terms and techniques to be used throughout the intervention.

**Table 2: Key Terms and Techniques**

| **Term/Technique** | **Definition/Content** |
| --- | --- |
| Mindfulness | Mindfulness is awareness that arises through paying attention, on purpose, in the present moment, non-judgementally,” says Kabat-Zinn. “And then I sometimes add, in the service of self-understanding and wisdom.” |
| Mindfulness-based stress reduction | Mindfulness-Based Stress Reduction (MBSR) is an effective, scientifically researched method for reducing physical and psychological suffering while building resilience, balance, and peace of mind.  Learning to practice mindfulness provides a way of relating directly with whatever is happening in your life, a way of taking charge of your life, of consciously and systematically   noticing and responding to your own stress and pain, and to the challenges and demands of living as well. This starts with cultivating present-moment attention in an open, non-judgmental way. |
| Motivational interviewing | Motivational Interviewing (MI) consists of a set of empirically supported interpersonal communication techniques designed to produce rapid internally motivated changes in health-related behaviours. It is a patient-centred approach to enhancing individuals’ motivation to change, and one of its main underlying principles is that people cannot be forced to change their behaviour if they are not ready. Equally important, MI recognizes that each individual patient is potentially the best source of information about the particular barriers that they may face to behaviour change or maintenance of safer behaviour. The MI strategy seeks patient insight on this issue and then uses it as the basis for collaboratively formulating individually tailored strategies for change or maintenance. |
| Acceptance and commitment therapy | Acceptance and commitment therapy (ACT) is a type of psychotherapy that emphasizes acceptance to deal with negative thoughts, feelings, symptoms, or circumstances. ACT therapy encourages increased commitment to healthy, constructive activities that uphold your values or goals. ACT is a third-wave cognitive-behavioural therapy approach that focuses on helping people accept difficult thoughts, feelings, sensations, and internal experiences while guiding them to commit to values-based actions. |

# Overview of the Intervention

The proposed intervention will involve small groups of participants (12 MSM and 12 transgender women) attending eight sessions over an 8-week period. Amongst the range of topics to be covered, some will be delivered for all participants, some will be adapted to be delivered separately to either the MSM or transgender groups (all sessions will have the same overall theme, however). Sessions take place at one-week intervals. Each session has two 60-minute sections (A and B) with a 30-minute break between sections. An additional 30-60 minutes of 'open time' will be made available following each session for social networking and for access to other services provided by the organisation hosting the intervention. This may include, for example, opportunities for individual counselling and support with qualified individuals (medical officer or clinical psychologist, for example).

An outline for the sessions is shown below (**Table 1**). It is adapted from multi-session interventions designed by Fisher et al. 2008 (the 'Options Protocol') and Rose et al. 2022 (the Khanya project).[[1]](#footnote-1) The mindfulness and MBSR components are cross-cutting. Following the introductory session (1.B), each subsequent session will begin with 15-20 minutes of mindfulness practice.

**Table 1: Outline of content and format for sessions**

| **Session** | **Session Theme and Contents** | **Session format** | **Expected outputs** | **Expected outcomes** |
| --- | --- | --- | --- | --- |
| 1.A | Introduction, orientation, distribution of materials. | Facilitated group discussion | - Knowledge and understanding of the intervention and expectations/ - Responsibilities of participants (including ground rules regarding privacy and confidentiality). | - Participants commit to completing the intervention; a safe and confidential environmental is established for all participants. |
| 1.B | Introduction to mindfulness and mindfulness-based stress reduction | Expert-led group discussion and learning practice | - Knowledge and understanding of mindfulness and it useful for personal stress reduction. - Commitment to eight-week course of group/individual mindfulness exercises | - Understanding of MBSR techniques and confidence to be able to practice them (in the group and individually) over the intervention period. |
| 2.A | HIV and anti-retroviral therapy: what do we know, what do we not know? | Expert-led group discussion | - Update to date knowledge of HIV and anti-retroviral therapy. - Positive and accurate heuristics regarding effects of ART and importance of adherence. | - Improved understanding and confidence in HIV and ART knowledge. Reduction of myths/ - misunderstandings or inaccurate heuristics. |
| 2.B | ART for life? this 'ins' and 'outs' of commitment. | Group-based motivational interviewing | - Practical tips and tools (mainly through experience sharing) for boosting and sustain motivation to adhere to ART. - Practical approaches to building/maintaining social network connections to strengthen and sustain motivation. | - Improved confidence and commitment to adhere to ART regardless of contingencies or contextual influences (moderators). |
| 3.A | Disclosure: what's the big deal? | Group-based motivational interviewing | - Increase in practical knowledge and skills for managing disclosure across different settings. - Strengthening of social support networks for managing/mitigation the risks and consequences of disclosure. | - Improve self-confidence and agency to manage disclosure. - Increase solidarity with other KPs living with HIV for mutual support to collectively mitigate risks and consequences of disclosure. |
| 3.B | Adherence skills: | Group-based motivational interviewing | - Shared learning regarding practical skills for reinforcing and protecting ART adherence. - Building mutual solidarity and trust through shared experience. | - Increased confidence to achieve ART adherence regardless of contextual influences or life's contingencies. - Shared learning and mutual reinforcement of the importance of ART adherence. |
| 4.A | Introduction to mental health | Expert-led session  Guided discussion | - Improved knowledge/understanding of mental health and its importance for quality of life. - Improved knowledge/ - understanding of signs and symptoms of common mental health challenges. - Knowledge of practical strategies for managing mental health and maintaining good mental health. - Knowledge of pathways for seeking assistance. | - Improved self-confidence and agency to manage and improve mental health, including when to seek assistance. |
| 4.B | Coping skills: alcohol use and other strategies | Expert-led discussion  Experience sharing | - Personal reflection on alcohol use and other problematic coping mechanisms. - Practical knowledge/ - skills for managing alcohol use. - Understanding of when and how to seek help. | - Understanding of drivers/incentives of alcohol use. - Increased confidence in ability to manage alcohol consumption. - Increased confidence to recognise problematic drinking and to seek help. |
| 5.A | Stigma and intersectional stigma: what it is, what it does, how to resist it. | Role-play  Guided discussion | - Understanding of the mechanics and effects of stigma, including as a risk to ART adherence - Understanding of practical strategies for avoiding or resisting the influence of stigma | - Improved confidence to manage the effects of stigma. - Decreased anxiety regarding encountering stigma. |
| 5.B | Mid-point reflection and consolidation: are we together? | Facilitated discussion | - Mutual and exchange and confidence building. | - Increased self-confidence and agency to strengthen/ - sustain ART adherence. |
| 6.A | Positive sexuality | Group-based ACT | - Understanding of nature of risk in sexual encounters. - Practical knowledge and skills for reducing risk in sexual encounters. | - Increased self-confidence and agency to reduce sexual risk to self and others (including disclosure). |
| 6.B | Love and relationships | Group-based ACT | - Experience sharing on 'triumphs' and 'tragedies' of love and relationships as an HIV+ KP. | - Increased self-confidence and agency to find, negotiate and sustain romantic partnerships. - Increased self-confidence and agency to manage love and desire. |
| 7.A | Finding resilience | Group-based ACT | - Knowledge and understanding of modalities for acquiring and sustain resilience. - Knowledge of opportunities for seeking assistance and support. | - Increased ability to acquire and sustain resilience. |
| 7.B | The integrated self | Group-based ACT | - Shared experiences of acceptance/ - affirmation as a sexual minority living with HIV. - Practical knowledge and skills for managing periods of stress or self-doubt and restoring confidence and affirmation. | - Increased personal acceptance and belief in a positive and rewarding future as an integrated self. - Stronger bonds for mutual solidarity and support. |
| 8.A | Open session: What have you achieved? What has changed? What has not changed? | Facilitated discussion | NA | - Mutual solidarity and celebration of personal and collective growth. |
| 8.B | Closing exercise: In 5 years time... | Facilitated discussion | - Participants share ideas or aspirations for their positive futures. | - Increased commitment to mutual solidarity and support. |

Participants will be encouraged to undertake additional individual learning or behavioural tasks between sessions using a personal workbook. Participants will be linked via a facilitated WhatsApp group between sessions and will all have access to urgent support via peer facilitators with onward referral where required (urgent medical care or psychological support, for example).

# Intervention Participants and Peer Facilitators

This section provides further details on the proposed participants, the ideal location for the intervention, and the peer facilitators who will deliver the weekly sessions.

## Intervention Participants

The intervention participants will consist of the following:

- Individuals 18-24 years;
- Self-identified as gay, bisexual or transgender (male-to-female);
- Self-disclosed HIV-positive and on ART (minimum 6 months);
- Self-disclosed missing at least one dose in the past 3 months (4 weeks?);
- Will to participate in small group sessions with other MSM or transgender women on ART;
- Willing to commit to complete the intervention (8-week programme);
- Willing to attend audio-recorded interviews at start, end and post-3-month follow-up;
- Not currently participating in any other similar intervention aimed at strengthening ART adherence;

## Participant Engagement

Individuals will be invited to consider participation through direct approaches via health care providers, peer navigators or peer counsellors working in secure settings where ART services are currently provided to members of the study population (MSM and transgender women). Information about the intervention will also be circulated through social networks.

Prospective participants will be directed to contact the Research Coordinator. The Research Coordinator or Research Assistant will administer a brief eligibility screen tool and, if eligible, invite the prospective participant to attend a first data collection encounter with a trained Research Assistant.

At the start of the data collection encounter, the trained Research Assistant will review the eligibility criteria and confirm eligibility. He/she/they will also administer informed consent procedures including a detailed information sheet on the intervention and the expectations and requirements of participants, as well as risks and risk mitigation strategies.

Following informed consent, the Research Assistant will undertake baseline data collection.

## Intervention Locations

The intervention will be administered in safe locations chosen through consultation with KP-led host organisations in each country. These will likely include Drop-In Centres where ART services are provided (or other support services are provided to individuals on ART, such as medication refills), or the premises of KP-led community organisations where adequate measures are in place for assuring the confidentiality, privacy, safety and security of participants. The intervention requires the availability of two meeting rooms capable of accommodating 20-25 individuals in a private and comfortable environment (not in open settings where other activities are taking place at the same time, for example). The Host Organisation in consultation with the Lead Researcher and Research Coordinator will agree on a suitable location for the intervention.

## Intervention Facilitators

The intervention will be delivered by trained peer facilitators (two per intervention site). Individuals will undergo a five-day intensive training programming prior to the launch of the intervention. Candidates will be existing peer educators already working with the study population as recommended by their employers and other stakeholders. Members of the research team will interview each candidate prior to confirmation and referral for the training.

## Support for Intervention Facilitators

Intervention facilitators will receive routine supervision and support from a clinical officer as well as a mental health professional (clinical psychologist). This will include proactive risk identification and response as part of the training, weekly debriefs following each session, and continuous opportunities for additional support. A mid-term review meeting will be convened following the Session 4 to assess the implementation of the intervention, and to identify and address any emerging risks or challenges.

For each location where the intervention takes place, a senior in-charge individual (programme manager, DIC coordinator, for example) will be on-site for the duration of each session. This will enable timely response to risks and challenges. It will also assure the privacy, confidentiality, safety and security of participants while their or on-site for the intervention.

## Getting Ready for the Launch

At least one week before the start of the pilot, the following should be completed:

- Participants should be confirmed and have completed the base line data collection with the research assistants.
- As part of the data collection, participants should have signed informed consent forms which include a pledge on their part to complete all eight sessions.
- Participants should have reviewed and understood the information sheet about the pilot intervention and what will be expected of them.
- Host organisations and peer facilitators should have prepared the space (or agreed on how the space will be prepared for each session if the space is also used for other activities).
- Participants should have received reminders about attending the first session.
- Materials needed for the first session should have been purchased and prepared.
- Peer facilitators should have reviewed the session plan and rehearsed between them how they will share the facilitation responsibilities.

# Session 1: Starting the Journey

**Overview**

The first session is about introductions and setting the stage for the entire eight-week intervention. Participants begin the journey by getting to know each other, agreeing to some ground rules, sharing their expectations for the journey and then, in the second half, learning about mindfulness and its usefulness for managing stress.

**Preparation**

The following should be prepared before the session begins:

- Room set up, including chairs placed in a large circle.
- Index cards and markers for participants to write expectations.
- Colourful name tags that can stick to clothing.
- Materials for ice-breaker exercise.
- Copies of information sheets with emergency assistance instructions.
- Copies of participant workbooks.
- Set up for refreshments.
- Transport refunds and tracking sheets.

**Part A**

| **No.** | **Duration** | **Task** |
| --- | --- | --- |
| 1 | 5 mins | Convene the group. Ensure everyone is comfortably seated, peer facilitators introduce themselves and welcome participants. |
| 2 | 20 mins | Participant introductions. Participants introduce themselves giving their first names only, their preferred pronouns, and two additional facts about themselves: My favourite colour is....; If I were an animal, I would be.... As they introduce themselves, they fill out their name tags. During the introductions one of the facilitators keeps a tally of colours and animals and gives a summary at the end of the exercise. |
| 3 | 10 mins | Brief overview of intervention. Peer facilitators give short slide presentation about the intervention and what it hopes to achieve. |
| 4 | 30 mins | Participant expectations. Peer facilitators distribute the index cards and markers. Participants are asked to write the most important thing they would like to achieve by participating in the intervention. Participants read out their cards. The cards are collected and sorted during the break by the facilitator. |
| 5 | 5 mins | Ground rules. Facilitators work with participants to establish ground rules, including essential rules regarding privacy and confidentiality. |

**BREAK--30 mins.** During this first session, peer facilitators help participants to meet and engage each other.

**Part B**

| **No.** | **Duration** | **Task** |
| --- | --- | --- |
| 1 | 10 mins | Introduction to mindfulness. Peer facilitators give short presentation on mindfulness and its uses in managing stress and improving mental health. |
| 2 | 20 mins | First mindfulness practice. Facilitators lead participants through a mindfulness exercise (mindful eating) and then encourage participants to share reflections. |
| 3 | 10 mins | Second mindfulness practice. Facilitators lead participants through a 10-minute mindful breathing exercise. |
| 4 | 10 mins | Introduction to participant exercises. Facilitators introduce participants to the daily mindfulness exercises they can do on their own between sessions. |
| 5 | 10 mins | Wrap up. Facilitators wrap up the session and ask for one or two candid reflections from participants 0n their experiences. The topic for the next session is briefly introduced. Participants are encouraged to do their exercises. Participants are encouraged to stay for some additional social time |

**Participant exercises**

Mindful breathing

Others?

# Session 2: HIV and Me--HIV and ART from A to Z

**Overview**

The second session begins to address the 'adherence information' and 'adherence motivation' components of the conceptual framework (**Figure 1**, above). During the second session, participants explore in some detail their knowledge and understanding of HIV and ART. They also begin to share their experiences as a young sexual minority living with HIV, both positive and negative aspects. An experienced clinician is present for the session to help ensure accurate knowledge among the participants. During the second half of the session, peer facilitator use motivation interviewing techniques to probe participant commitment to positive health, including ART adherence amongst other positive health practices. From the second session onwards, each session begins with a mindfulness exercise and reflection.

**Preparation**

The following should be prepared before the session begins:

- Room set up, including chairs placed in a large circle.
- Colourful name tags that can stick to clothing (if needed)
- Copies of information sheets about HIV and ART (if needed)
- Copies of knowledge quiz and prizes
- Materials for motivational interviewing (?)
- Set up for refreshments.
- Transport refunds and tracking sheets.

**Part A**

| **No.** | **Duration** | **Task** |
| --- | --- | --- |
| 1 | 5 mins | Convene the group. Ensure everyone is comfortably seated, peer facilitators introduce themselves and welcome participants. |
| 2 | 20 mins | Guided mindfulness practice. Peer facilitators lead 10 minutes of mindful breathing followed by a brief reflection on mindfulness experiences during the past week. |
| 3 | 25 mins | HIV and ART, all you need to know. Peer facilitator leads an interactive session between guest clinician expert and participants on latest knowledge/understanding of HIV and the developing science of HIV management, including ART. |
| 4 | 10 mins | Knowledge quiz. Participants complete a knowledge quiz. Facilitators review and discuss results. Prizes are awarded (everyone gets something in the end). |

**BREAK--30 mins.** Peer facilitators help participants to meet and engage each other.

**Part B**

| **No.** | **Duration** | **Task** |
| --- | --- | --- |
| 1 | 10 mins | Experiences with ART. Participants share the 'highs' and 'lows' of being on ART. |
| 2 | 25 mins | Strengthening commitment to ART. Facilitators lead participants through a group motivational interviewing exercise to identify barrier or risks to full commitment, and to identify ways to improve and sustain commitment. |
| 3 | 10 mins | My commitment plan. Participants fill out section in workbook on commitment plan to ART. Facilitators ask participants to give examples from their plans. |
| 4 | 15 mins | Wrap up. Facilitators wrap up the session and ask for one or two candid reflections from participants 0n their experiences. The topic for the next session is briefly introduced. Participants are encouraged to continue their daily mindfulness practice and to honour their commitment plan. Participants are encouraged to stay for some additional social time. |

# Session 3: Managing Disclosure and Adherence Skills

**Overview**

The third session begins to address the 'adherence behaviour' component of the conceptual framework and starts to address 'mitigating the moderators', particular fear of disclosure and the consequences of secrecy. During the first part of the session, participants explore in detail processes of disclosure, of their sexual orientation or gender identity, as well as their health status. Different scenarios are explored through role play and experience sharing. During the second part of the session, participants explore adherence skills through experience sharing and motivational interviewing techniques.

**Preparation**

The following should be prepared before the session begins:

- Room set up, including chairs placed in a large circle.
- Colourful name tags that can stick to clothing (if needed)
- Materials for motivational interviewing (?)
- Five-point plan template
- Set up for refreshments.
- Transport refunds and tracking sheets.

**Part A**

| **No.** | **Duration** | **Task** |
| --- | --- | --- |
| 1 | 5 mins | Convene the group. Ensure everyone is comfortably seated, peer facilitators introduce themselves and welcome participants. |
| 2 | 15 mins | Guided mindfulness practice. Peer facilitators lead 10 minutes of mindful breathing followed by a brief reflection on mindfulness experiences during the past week. |
| 3 | 30 mins | The ins and outs of disclosure. Peer facilitators lead a guided experience sharing session on disclosure. Topics to be explored include what to share, whom to share it with, when to share it, reasons for not sharing, and managing the 'burden of hiding' or non-disclosure. The aim of the session is to explore pathways for encouraging greater confidence for disclosure in situations where risks can be anticipated and managed. |
| 4 | 10 mins | Disclosure role play. Facilitators guide participants through different scenarios for disclosure (health worker, parent, friend, romantic partner) and how to mitigate negative outcomes and how to seek support should negative outcomes arise. |

**BREAK--30 mins.** Peer facilitators help participants to meet and engage each other.

**Part B**

| **No.** | **Duration** | **Task** |
| --- | --- | --- |
| 1 | 15 mins | Adherence skills. Facilitators lead a guided discussion on adherence skills, or the different ways individual integrate daily ART into their life routines. Negative examples are also explored. |
| 2 | 20 mins | Adherence skills strengthening. Peer facilitators use motivational interviewing techniques to guide participants on strengthening adherence skills. |
| 3 | 25 mins | Five-point plans. Facilitators guide participants to complete 'five-point plans' for strengthening their adherence skills. |
| 4 | 10 mins | Wrap up. Facilitators wrap up the session and ask for one or two candid reflections from participants 0n their experiences. The topic for the next session is briefly introduced. Participants are encouraged to continue their daily mindfulness practice and to honour their commitment plan. Participants are encouraged to stay for some additional social time. |

# Session 4: Mental health, coping and resilience

**Overview**

The fourth session addresses mental health and its influence across the core components of the conceptual framework, particularly 'adherence behaviour' and 'health outcomes'.

Mental health is also the main moderating factor to be mitigating through strengthening positive coping and resilience beliefs and behaviours. During the first part of the session, a mental health expert joins the participants to discuss mental health and its influence on positive health outcomes. Participants are encouraged to share both positive and negative mental health experiences. During the second part of the session, participants explore coping and resilience practices, including problematic coping mechanisms such as high alcohol consumption. Participants are encouraged to draw on their mindfulness skills as one coping mechanism. Participants learn about resources available to them to assist with mental health needs.

**Preparation**

The following should be prepared before the session begins:

- Room set up, including chairs placed in a large circle.
- Colourful name tags that can stick to clothing (if needed)
- Materials for motivational interviewing (?)
- Mental health information sheet.
- Mental health checklist.
- Set up for refreshments.
- Transport refunds and tracking sheets.

**Part A**

| **No.** | **Duration** | **Task** |
| --- | --- | --- |
| 1 | 5 mins | Convene the group. Ensure everyone is comfortably seated, peer facilitators introduce themselves and welcome participants. |
| 2 | 15 mins | Guided mindfulness practice. Peer facilitators lead 10 minutes of mindful breathing followed by a brief reflection on mindfulness experiences during the past week. |
| 3 | 20 mins | Introduction to mental health. Peer facilitators lead an interactive discussion between invited expert and participants on mental health basics and its influence on positive health outcomes. Facilitators encourage participants to share experiences, positive and negative, on how they address their mental health. |
| 4 | 20 mins | Dealing with mental distress. Peer facilitators lead an interactive discussion between invited expert and participants on strategies and resources for dealing with mental distress, including opportunities for urgent assistance. Participants complete the 'mental health check list' and discuss results. |

**BREAK--30 mins.** Peer facilitators help participants to meet and engage each other.

**Part B**

| **No.** | **Duration** | **Task** |
| --- | --- | --- |
| 1 | 10 mins | Coping behaviours. Facilitators lead a guided discussion on positive and negative coping behaviours in response to mental-health-related stress. There is a specific focus on alcohol consumption as a coping mechanism as well as ways to moderate alcohol consumption and to find and embrace other stress management mechanisms. |
| 2 | 20 mins | Strengthening skills for positive coping and resilience. Peer facilitators use motivational interviewing techniques to guide participants on strengthening positive coping and resilience practices. There is a specific focus on reducing risks to ART adherence. |
| 3 | 15 mins | The value of mindfulness for stress reduction. Facilitators guide participants through additional mindfulness practices that reduce stress in different scenarios. |
| 4 | 15 mins | Wrap up. Facilitators wrap up the session and ask for one or two candid reflections from participants 0n their experiences. The topic for the next session is briefly introduced. Participants are encouraged to continue their daily mindfulness practice and to honour their commitment plan. Participants are encouraged to stay for some additional social time. |

# Session 5

| **No.** | **Duration** | **Task** |
| --- | --- | --- |
| 1 | 5 mins | Convene the group. Ensure everyone is comfortably seated, peer facilitators introduce themselves and welcome participants. |
| 2 | 35 mins | Exercise. Understanding what stigma (intersectional) is. Asking the participants what their understanding around stigma is. (We tie it back to coping mechanisms). |
| 3 | 20 mins | Facilitators introduce an exercise informed by a tool: Promoting Reductions in Intersectional Stigma (PRISM) |

**BREAK--30 mins.** Peer facilitators help participants to meet and engage each other.

| **No.** | **Duration** | **Task** |
| --- | --- | --- |
| 1 | 5 mins | Parallel Session  Participants are divided into 6 groups as pairs for mutual exchange and confidence building. |
| 2 | 35 mins | Feedback from the breakout sessions moderated by the peer facilitators. |
| 3 | 20 mins | Group session for midpoint reflections through participants making two drawings at where they were at the start of the intersections and where they are now. Wrap up! Facilitators wrap up the session the topic for the next session is briefly introduced. |

# Session 6

| **No.** | **Duration** | **Task** |
| --- | --- | --- |
| 1 | 5 mins | Convene the group. Ensure everyone is comfortably seated, peer facilitators introduce themselves and welcome participants. |
| 2 | 35 mins | Group discussion led by the peer facilitator on sexual pleasure and also issues around disclosure in a relation making reference to the (Pleasure Project). |
| 3 | 25 mins | Discuss risky sexual behavior; sexually transmitted infections and re-infection should also be included. IPV and Consent exercise |

**BREAK--30 mins.** Peer facilitators help participants to meet and engage each other.

| **No.** | **Duration** | **Task** |
| --- | --- | --- |
| 1 | 25 mins | An interactive session finding on experiences of romantic and sexual relationships. What are the challenges and opportunities for building lasting relationships? |
| 2 | 30 mins | Exercise and role playing on seeking consent, negotiating condom use and disclosure of HIV status. |
| 3 | 5 mins | Wrap Up! Facilitators wrap up the session the topic for the next session is briefly introduced. |

# Session 7

| **No.** | **Duration** | **Task** |
| --- | --- | --- |
| 1 | 10 mins | Convene the group. Ensure everyone is comfortably seated, peer facilitators introduce themselves and welcome participants. Peer facilitators introduce activity for the day -Short Documentary:participants and peer facilitator choose a documentary that highlights resilience as a theme. |
| 2 | 30 mins | Video screening of the short documentary |
| 3 | 20 mins | Dialogue based on the video screening and participants discuss modalities for acquiring and sustaining resilience. Peer facilitator guides dialogues through 7C’s that make up being resilient – competence, confidence, connection, character, contribution, coping and control. |

**BREAK--30 mins.** Peer facilitators help participants to meet and engage each other.

| **No.** | **Duration** | **Task** |
| --- | --- | --- |
| 1 | 25 mins | **WHO ARE YOU?** Ask participants to write who they are? Encourage them to share an integrated description including their SOGI and HIV status. |
| 2 | 30 mins | Peer facilitators moderate discussion on experiences around living with HIV, sexual or gender minority and being on ART. |
| 3 | 5 mins | Wrap Up! Facilitators wrap up the session the topic for the next session is briefly introduced. |

# Session 8

| **No.** | **Duration** | **Task** |
| --- | --- | --- |
| 1 | 5 mins | Convene the group. Ensure everyone is comfortably seated, peer facilitators introduce themselves and welcome participants. |
| 2 | 30 mins | Participants open up and reflect on the journal of life, point plan and the promise to self. |
| 3 | 25 mins | Participants reflect on what has changed and what has not changed from the beginning of the intervention to the end. |

**BREAK--30 mins.** Peer facilitators help participants to meet and engage each other.

| **No.** | **Duration** | **Task** |
| --- | --- | --- |
| 1 | 5 mins | Participants role play as themselves in five-years time. |
| 2 | 35 mins | Moderated discussion on plans moving forward, including maintaining communication and bonds formed during the 8-week period. |
| 3 | 20 mins | Wrap Up! Peer facilitator asks for question and closes the intervention. |

## Research Measures

Two sets of outcomes will be monitored as shown below (**Table 4**). These will be measured at baseline, immediately post-intervention, and three-months post-intervention.

| **Behavioural Outcomes** | **Measure** | **Measurement process** |
| --- | --- | --- |
| Adherence | Missed doses in past four weeks | Participants self-administer two questions regarding missed doses. Participants are invited to comment on their adherence during the in-depth interviews. |
| Adherence self-efficacy | HIV-Adherence Self-Efficacy Scale (Johnson et al. 2007 with local adaption? See **Annex A**) | Participants self-administer twelve-questions which are then scored by a research assistant. Participants are invited to comment on adherence self-efficacy during in-depth interviews. |
| Alcohol consumption | AUDIT | Participants self-administer ten questions which are then scored by the research assistance. Participants invited to comments on alcohol use during in-depth interviews. |
| Depression | CES-D-10 item scale | Participants self-administer 10 questions which are then scored by a research assistant. Participants invited to comment on the state of their mental health during in-depth interviews. |
| Affect | Affect-related questions (SOGI and HIV status) from the PLHIV Stigma Index 2.0 tool | Participants self-administer 10 affect-related questions. Participants invited to comment on the state of their mental health during in-depth interviews. |
| Recent sexual behaviour | Recent sexual behaviour questions from the IBBS guide. | Participants self-administer 7 sexual behaviour questions. |
| **Implementation Outcomes** | **Measure** | **Measurement process** |
| Feasibility | Feasibility of Intervention Measure  (Weiner et al. 2017) | Participants and intervention facilitators complete a 5-question scale. Both groups are invited to comment on feasibility during in-depth interviews immediately post-intervention. |
| Acceptability | Acceptability of Intervention Measure  (Weiner et al. 2017) | Participants and intervention facilitators complete a 5-question scale. Both groups are invited to comment on feasibility during in-depth interviews immediately post-intervention. |
| Appropriateness | Appropriateness of Intervention Measure  (Weiner et al. 2017) | Participants and intervention facilitators complete a 5-question scale. Both groups are invited to comment on feasibility during in-depth interviews immediately post-intervention. |
| Adoption | In-depth interview questions on uptake; utilization; initial implementation; intention to try (Proctor et al. 2011) | Interviewing the implementing partners in all the countries the experiences of adopting the intervention. This assessment can be done via in-depth interviews. |
| Fidelity | In-depth interview questions on delivered as intended; adherence; integrity; quality of program delivery (Proctor et al. 2011) | Interviewing the implementing partners through on adherence to the implementation plan.  Participants and intervention facilitators complete a questionnaire on implementation adherence process and the experiences of the implementation process. |

## Risks and Risk Mitigation

The main risks and proposed risk mitigation measures are shown below (**Table 5**):

**Table 5: Risks and risk mitigation**

| **Risk** | **Risk Mitigation** |
| --- | --- |
| Psychological distress arising from topics and exercises in the individual sessions. | Intervention facilitators will receive training on proactive recognition of psychological distress and appropriate responses. Participants will be given contacts of intervention facilitators and local KP-friendly services provider and encouraged to contact these individuals at any time during the interventions. Urgent referral pathways will be established in each country linking participants to qualified mental health professionals. |
| Breach of confidentiality | Confidential is a paramount concern for members of the study population, particularly amongst their non-HIV-positive peers. Norms will be established and monitored at the start of the intervention regarding confidentiality and privacy, including advising participants of relevant laws and policies that sanction disclosure of HIV status without consent. Confidentiality will be continuously monitored by intervention facilitators, local researchers, the study manager and other relevant focal points. The risk of disclosure will be addressed with all prospective participants during the informed consent procedures. Participants or intervention facilitators who breach confidentiality will be asked to leave the study immediately and may be subject to further sanctions depending on applicable local laws or policies. |
| Safety and security | MSM and transgender women face daily security risks in each country, particularly traveling to and from DICs or health facilities in communities known to be frequented by members of these groups. Local implementing partners conduct engagement sessions and provide outreach support to create safe and enabling environments for accessing services. They also provide rapid response mechanisms for KPs in distress. These will be leverage during the implementation of the pilot intervention to assure the safety and security of participants and to provide rapid, comprehensive responses to participants who may encounter distress. Should security risks be elevated, sessions may be postponed and/or relocated to safer or securer settings. |

# References

Adefolalu, A.O., 2018. Cognitive-behavioural theories and adherence: application and relevance in antiretroviral therapy. *Southern African journal of HIV medicine*, *19*(1), pp.1-7.

Cohen, J.M. and Newman, M.G., 2019. Group-based cognitive-behavioral therapies with sexual minority clients. In Pachankis, J.E. and Safren, S.A. eds., 2019. *Handbook of evidence-based mental health practice with sexual and gender minorities*. Oxford University Press, USA.

Fisher, J.D., Amico, K.R., Fisher, W.A. and Harman, J.J., 2008. The information-motivation-behavioral skills model of antiretroviral adherence and its applications. *Current HIV/AIDS Reports*, *5*(4), pp.193-203.

Fisher, W.A., Fisher, J.D. and Shuper, P.A., 2014. Social psychology and the fight against AIDS: An information–Motivation–Behavioral skills model for the prediction and promotion of health behavior change. In *Advances in experimental social psychology* (Vol. 50, pp. 105-193). Academic Press.

Fowler, J.A., Viskovich, S., Buckley, L. and Dean, J.A., 2022. A call for ACTion: A systematic review of empirical evidence for the use of Acceptance and Commitment Therapy (ACT) with LGBTQI+ individuals. *Journal of Contextual Behavioral Science*.

Gayner, Bill, Mary Jane Esplen, Peter DeRoche, Jiahui Wong, Scott Bishop, Lynn Kavanagh, and Kate Butler. "A randomized controlled trial of mindfulness-based stress reduction to manage affective symptoms and improve quality of life in gay men living with HIV." *Journal of behavioral medicine* 35 (2012): 272-285.

Johnson MO, Neilands TB, Dilworth SE, Morin SF, Remien RH, Chesney MA. The role of self-efficacy in HIV treatment adherence: validation of the HIV Treatment Adherence Self-Efficacy Scale (HIV-ASES). Journal of behavioral medicine. 2007 Oct;30:359-70.

Kiene, S.M., Fisher, W.A., Shuper, P.A., Cornman, D.H., Christie, S., MacDonald, S., Pillay, S., Mahlase, G. and Fisher, J.D., 2013. Understanding HIV transmission risk behavior among HIV-infected South Africans receiving antiretroviral therapy: An Information—Motivation—Behavioral Skills Model analysis. *Health Psychology*, *32*(8), p.860.

Luoma, J.B. and Platt, M.G., 2015. Shame, self-criticism, self-stigma, and compassion in acceptance and commitment therapy. *Current opinion in Psychology*, *2*, pp.97-101.

Magidson, J.F., Joska, J.A., Belus, J.M., Andersen, L.S., Regenauer, K.S., Rose, A.L., Myers, B., Majokweni, S., O’Cleirigh, C. and Safren, S.A., 2021. Project Khanya: results from a pilot randomized type 1 hybrid effectiveness‐implementation trial of a peer‐delivered behavioural intervention for ART adherence and substance use in HIV care in South Africa. *Journal of the International AIDS Society*, *24*, p.e25720.

Magidson, J.F., Joska, J.A., Regenauer, K.S., Satinsky, E., Andersen, L.S., Seitz-Brown, C.J., Borba, C.P., Safren, S.A. and Myers, B., 2019. “Someone who is in this thing that I am suffering from”: The role of peers and other facilitators for task sharing substance use treatment in South African HIV care. *International Journal of Drug Policy*, *70*, pp.61-69.

Moitra, E., Herbert, J.D. and Forman, E.M., 2011. Acceptance-based behavior therapy to promote HIV medication adherence. *AIDS care*, *23*(12), pp.1660-1667.

Munro, S., Lewin, S., Swart, T. and Volmink, J., 2007. A review of health behaviour theories: how useful are these for developing interventions to promote long-term medication adherence for TB and HIV/AIDS?. *BMC public health*, *7*(1), pp.1-16.

Ouansafi, I., Chibanda, D., Munetsi, E. and Simms, V., 2021. Impact of Friendship Bench problem-solving therapy on adherence to ART in young people living with HIV in Zimbabwe: A qualitative study. *PLoS One*, *16*(4), p.e0250074.

Parsons, J.T., Golub, S.A., Rosof, E. and Holder, C., 2007. Motivational interviewing and cognitive-behavioral intervention to improve HIV medication adherence among hazardous drinkers: a randomized controlled trial. *Journal of acquired immune deficiency syndromes (1999)*, *46*(4), p.443.

Parsons, J.T., John, S.A., Millar, B.M. and Starks, T.J., 2018. Testing the efficacy of combined motivational interviewing and cognitive behavioral skills training to reduce methamphetamine use and improve HIV medication adherence among HIV-positive gay and bisexual men. *AIDS and Behavior*, *22*, pp.2674-2686.

Proctor, E., Silmere, H., Raghavan, R., Hovmand, P., Aarons, G., Bunger, A., Griffey, R. and Hensley, M., 2011. Outcomes for implementation research: conceptual distinctions, measurement challenges, and research agenda. *Administration and policy in mental health and mental health services research*, *38*, pp.65-76.

Riley, K.E. and Kalichman, S., 2015. Mindfulness-based stress reduction for people living with HIV/AIDS: preliminary review of intervention trial methodologies and findings. *Health psychology review*, *9*(2), pp.224-243.

Rose, A.L., Belus, J.M., Hines, A.C., Barrie, I., Regenauer, K.S., Andersen, L.S., Joska, J.A., Ciya, N., Ndamase, S., Myers, B. and Safren, S.A., 2022. Patient and provider perceptions of a peer-delivered intervention (‘Khanya’) to improve anti-retroviral adherence and substance use in South Africa: a mixed methods analysis. *Cambridge Prisms: Global Mental Health*, *9*, pp.439-447.

Safren, S.A., Otto, M.W. and Worth, J.L., 1999. Life-steps: Applying cognitive behavioral therapy to HIV medication adherence. *Cognitive and Behavioral Practice*, *6*(4), pp.332-341.

Skinta, M.D., Lezama, M., Wells, G. and Dilley, J.W., 2015. Acceptance and compassion-based group therapy to reduce HIV stigma. *Cognitive and Behavioral Practice*, *22*(4), pp.481-490.

Smith, R., Villanueva, G., Probyn, K., Sguassero, Y., Ford, N., Orrell, C., Cohen, K., Chaplin, M., Leeflang, M.M. and Hine, P., 2022. Accuracy of measures for antiretroviral adherence in people living with HIV. *Cochrane Database of Systematic Reviews*, (7).

Wagner GJ, Ghosh-Dastidar B, Robinson E, Ngo VK, Glick P, Mukasa B, Musisi S, Akena D. Effects of depression alleviation on ART adherence and HIV clinic attendance in Uganda, and the mediating roles of self-efficacy and motivation. AIDS and Behavior. 2017 Jun;21:1655-64.

Weiner, B.J., Lewis, C.C., Stanick, C., Powell, B.J., Dorsey, C.N., Clary, A.S., Boynton, M.H. and Halko, H., 2017. Psychometric assessment of three newly developed implementation outcome measures. *Implementation science*, *12*, pp.1-12.

WHO, 2019. mhGAP Intervention Guide 2.0. Geneva: WHO. Available:

https://www.who.int/publications/i/item/9789241549790

1. The Options Manual is available at: https://admin.publichealth.lacounty.gov/dhsp/Contractors/MCC/Appendix%20O%20-%20Options-OpcionesManual.pdf [↑](#footnote-ref-1)
